# Supplementary material for: Spatial-Temporal Change Trend Analysis of Second-Hand House Price in Hefei Based on Spatial Network
Source: Hindawi journal article supplement (doi:10.1155/2022/6848038), 2022-05-23
Supplement: f1 [file 6848038.f1.pdf]

| Administrative regi | Number | Coordinates           | 2020    |          |          |         |          | 2021  |       |       |       |       |        |
|---------------------|--------|-----------------------|---------|----------|----------|---------|----------|-------|-------|-------|-------|-------|--------|
|                     |        |                       | October | November | December | January | February | March | April | May   | June  | July  | August |
| Yaohai District     | 1      | 117.315839, 31.882828 | 14091   | 14022    | 14135    | 14409   | 14431    | 14456 | 14487 | 14741 | 14958 | 15017 | 15096  |
|                     | 2      | 117.311895, 31.8833   | 13454   | 13602    | 13191    | 12722   | 12771    | 13059 | 13286 | 13178 | 13233 | 13325 | 13365  |
|                     | 3      | 117.309443, 31.884692 | 13015   | 12826    | 13063    | 13208   | 13244    | 13290 | 13266 | 13525 | 13356 | 13172 | 12959  |
|                     | 4      | 117.313647, 31.887236 | 12211   | 12229    | 12164    | 12190   | 12194    | 12372 | 12423 | 12251 | 11733 | 12279 | 12902  |
|                     | 5      | 117.32263, 31.882193  | 11731   | 11647    | 11664    | 11636   | 11626    | 11733 | 12161 | 11933 | 11849 | 11713 | 12026  |
|                     | 6      | 117.323388, 31.886248 | 11802   | 10452    | 10527    | 11082   | 10775    | 11411 | 11901 | 12281 | 12160 | 12110 | 11923  |
|                     | 7      | 117.324831, 31.884876 | 11437   | 11482    | 11699    | 11852   | 12104    | 12105 | 12095 | 12096 | 11893 | 11614 | 11786  |
|                     | 8      | 117.32239, 31.885574  | 11887   | 11632    | 11666    | 12326   | 12701    | 12637 | 12624 | 12644 | 12624 | 12581 | 12500  |
|                     | 9      | 117.322115, 31.882133 | 16692   | 16812    | 16934    | 16967   | 16781    | 16793 | 17699 | 18273 | 18921 | 19607 | 20612  |
|                     | 10     | 117.3418, 31.884354   | 13846   | 13864    | 13755    | 13543   | 13629    | 13699 | 13873 | 13933 | 13920 | 14216 | 14388  |
|                     | 11     | 117.341279, 31.881564 | 11893   | 11860    | 11856    | 11894   | 11973    | 12008 | 12866 | 12224 | 12204 | 12856 | 13687  |
|                     | 12     | 117.336805, 31.878997 | 12932   | 11776    | 11716    | 11776   | 11776    | 10533 | 10465 | 10527 | 12719 | 13475 | 12756  |
|                     | 13     | 117.339716, 31.88023  | 12608   | 12523    | 13113    | 13364   | 13265    | 13143 | 12725 | 12701 | 12740 | 13098 | 13226  |
|                     | 14     | 117.345491, 31.881529 | 12197   | 12216    | 12217    | 12318   | 12449    | 12376 | 12509 | 12674 | 12742 | 12991 | 12512  |
|                     | 15     | 117.34531, 31.881527  | 12071   | 12043    | 11933    | 11714   | 11798    | 12131 | 12063 | 12142 | 12098 | 12062 | 11857  |
|                     | 16     | 117.34754, 31.879472  | 10478   | 10849    | 11389    | 11501   | 11779    | 11610 | 11346 | 11406 | 11313 | 11121 | 12637  |
|                     | 17     | 117.349373, 31.880085 | 10367   | 10317    | 10595    | 10877   | 10839    | 10691 | 10814 | 10926 | 11986 | 11534 | 12225  |
|                     | 18     | 117.348573, 31.876888 | 11458   | 11983    | 11172    | 11589   | 11474    | 11558 | 11546 | 11479 | 12065 | 12328 | 12264  |
|                     | 19     | 117.348573, 31.876888 | 11458   | 11983    | 11172    | 11589   | 11474    | 11558 | 11546 | 11479 | 12065 | 12328 | 12264  |
|                     | 20     | 117.348573, 31.876888 | 11458   | 11983    | 11172    | 11589   | 11474    | 11558 | 11546 | 11479 | 12065 | 12328 | 12264  |
|                     | 21     | 117.352041, 31.879816 | 11261   | 10619    | 10540    | 10895   | 11277    | 11016 | 11214 | 11476 | 11537 | 11485 | 11346  |
|                     | 22     | 117.352041, 31.879816 | 11261   | 10619    | 10540    | 10895   | 11277    | 11016 | 11214 | 11476 | 11537 | 11485 | 11346  |
|                     | 23     | 117.352041, 31.879816 | 11261   | 10619    | 10540    | 10895   | 11277    | 11016 | 11214 | 11476 | 11537 | 11485 | 11346  |
|                     | 24     | 117.352041, 31.879816 | 11261   | 10619    | 10540    | 10895   | 11277    | 11016 | 11214 | 11476 | 11537 | 11485 | 11346  |
|                     | 25     | 117.352041, 31.879816 | 11261   | 10619    | 10540    | 10895   | 11277    | 11016 | 11214 | 11476 | 11537 | 11485 | 11346  |
|                     | 26     | 117.352041, 31.879816 | 11261   | 10619    | 10540    | 10895   | 11277    | 11016 | 11214 | 11476 | 11537 | 11485 | 11346  |
|                     | 27     | 117.352041, 31.879816 | 11261   | 10619    | 10540    | 10895   | 11277    | 11016 | 11214 | 11476 | 11537 | 11485 | 11346  |
|                     | 28     | 117.352041, 31.879816 | 11261   | 10619    | 10540    | 10895   | 11277    | 11016 | 11214 | 11476 | 11537 | 11485 | 11346  |
|                     | 29     | 117.352041, 31.879816 | 11261   | 10619    | 10540    | 10895   | 11277    | 11016 | 11214 | 11476 | 11537 | 11485 | 11346  |
|                     | 30     | 117.352041, 31.879816 | 11261   | 10619    | 10540    | 10895   | 11277    | 11016 | 11214 | 11476 | 11537 | 11485 | 11346  |
|                     | 31     | 117.352041, 31.879816 | 11261   | 10619    | 10540    | 10895   | 11277    | 11016 | 11214 | 11476 | 11537 | 11485 | 11346  |
|                     | 32     | 117.352041, 31.879816 | 11261   | 10619    | 10540    | 10895   | 11277    | 11016 | 11214 | 11476 | 11537 | 11485 | 11346  |
|                     | 33     | 117.352041, 31.879816 | 11261   | 10619    | 10540    | 10895   | 11277    | 11016 | 11214 | 11476 | 11537 | 11485 | 11346  |
|                     | 34     | 117.352041, 31.879816 | 11261   | 10619    | 10540    | 10895   | 11277    | 11016 | 11214 | 11476 | 11537 | 11485 | 11346  |
|                     | 35     | 117.352041, 31.879816 | 11261   | 10619    | 10540    | 10895   | 11277    | 11016 | 11214 | 11476 | 11537 | 11485 | 11346  |
|                     | 36     | 117.352041, 31.879816 | 11261   | 10619    | 10540    | 10895   | 11277    | 11016 | 11214 | 11476 | 11537 | 11485 | 11346  |
|                     | 37     | 117.352041, 31.879816 | 11261   | 10619    | 10540    | 10895   | 11277    | 11016 | 11214 | 11476 | 11537 | 11485 | 11346  |
|                     | 38     | 117.352041, 31.879816 | 11261   | 10619    | 10540    | 10895   | 11277    | 11016 | 11214 | 11476 | 11537 | 11485 | 11346  |
|                     | 39     | 117.352041, 31.879816 | 11261   | 10619    | 10540    | 10895   | 11277    | 11016 | 11214 | 11476 | 11537 | 11485 | 11346  |
|                     | 40     | 117.352041, 31.879816 | 11261   | 10619    | 10540    | 10895   | 11277    | 11016 | 11214 | 11476 | 11537 | 11485 | 11346  |
|                     | 41     | 117.352041, 31.879816 | 11261   | 10619    | 10540    | 10895   | 11277    | 11016 | 11214 | 11476 | 11537 | 11485 | 11346  |
|                     | 42     | 117.352041, 31.879816 | 11261   | 10619    | 10540    | 10895   | 11277    | 11016 | 11214 | 11476 | 11537 | 11485 | 11346  |
|                     | 43     | 117.352041, 31.879816 | 11261   | 10619    | 10540    | 10895   | 11277    | 11016 | 11214 | 11476 | 11537 | 11485 | 11346  |
|                     | 44     | 117.352041, 31.879816 | 11261   | 10619    | 10540    | 10895   | 11277    | 11016 | 11214 | 11476 | 11537 | 11485 | 11346  |
|                     | 45     | 117.352041, 31.879816 | 11261   | 10619    | 10540    | 10895   | 11277    | 11016 | 11214 | 11476 | 11537 | 11485 | 11346  |
|                     | 46     | 117.352041, 31.879816 | 11261   | 10619    | 10540    | 10895   | 11277    | 11016 | 11214 | 11476 | 11537 | 11485 | 11346  |
|                     | 47     | 117.352041, 31.879816 | 11261   | 10619    | 10540    | 10895   | 11277    | 11016 | 11214 | 11476 | 11537 | 11485 | 11346  |
|                     | 48     | 117.352041, 31.879816 | 11261   | 10619    | 10540    | 10895   | 11277    | 11016 | 11214 | 11476 | 11537 | 11485 | 11346  |
|                     | 49     | 117.352041, 31.879816 | 11261   | 10619    | 10540    | 10895   | 11277    | 11016 | 11214 | 11476 | 11537 | 11485 | 11346  |
|                     | 50     | 117.352041, 31.879816 | 11261   | 10619    | 10540    | 10895   | 11277    | 11016 | 11214 | 11476 | 11537 | 11485 | 11346  |
|                     | 51     | 117.352041, 31.879816 | 11261   | 10619    | 10540    | 10895   | 11277    | 11016 | 11214 | 11476 | 11537 | 11485 | 11346  |
|                     | 52     | 117.352041, 31.879816 | 11261   | 10619    | 10540    | 10895   | 11277    | 11016 | 11214 | 11476 | 11537 | 11485 | 11346  |
|                     | 53     | 117.352041, 31.879816 | 11261   | 10619    | 10540    | 10895   | 11277    | 11016 | 11214 | 11476 | 11537 | 11485 | 11346  |
|                     | 54     | 117.352041, 31.879816 | 11261   | 10619    | 10540    | 10895   | 11277    | 11016 | 11214 | 11476 | 11537 | 11485 | 11346  |
|                     | 55     | 117.352041, 31.879816 | 11261   | 10619    | 10540    | 10895   | 11277    | 11016 | 11214 | 11476 | 11537 | 11485 | 11346  |
|                     | 56     | 117.352041, 31.879816 | 11261   | 10619    | 10540    | 10895   | 11277    | 11016 | 11214 | 11476 | 11537 | 11485 | 11346  |
|                     | 57     | 117.352041, 31.879816 | 11261   | 10619    | 10540    | 10895   | 11277    | 11016 | 11214 | 11476 | 11537 | 11485 | 11346  |
|                     | 58     | 117.352041, 31.879816 | 11261   | 10619    | 10540    | 10895   | 11277    | 11016 | 11214 | 11476 | 11537 | 11485 | 11346  |
|                     | 59     | 117.352041, 31.879816 | 11261   | 10619    | 10540    | 10895   | 11277    | 11016 | 11214 | 11476 | 11537 | 11485 | 11346  |
|                     | 60     | 117.352041, 31.879816 | 11261   | 10619    | 10540    | 10895   | 11277    | 11016 | 11214 | 11476 | 11537 | 11485 | 11346  |
|                     | 61     | 117.352041, 31.879816 | 11261   | 10619    | 10540    | 10895   | 11277    | 11016 | 11214 | 11476 | 11537 | 11485 | 11346  |
|                     | 62     | 117.352041, 31.879816 | 11261   | 10619    | 10540    | 10895   | 11277    | 11016 | 11214 | 11476 | 11537 | 11485 | 11346  |
|                     | 63     | 117.352041, 31.879816 | 11261   | 10619    | 10540    | 10895   | 11277    | 11016 | 11214 | 11476 | 11537 | 11485 | 11346  |
|                     | 64     | 117.352041, 31.879816 | 11261   | 10619    | 10540    | 10895   | 11277    | 11016 | 11214 | 11476 | 11537 | 11485 | 11346  |
|                     | 65     | 117.352041, 31.879816 | 11261   | 10619    | 10540    | 10895   | 11277    | 11016 | 11214 | 11476 | 11537 | 11485 | 11346  |
|                     | 66     | 117.352041, 31.879816 | 11261   | 10619    | 10540    | 10895   | 11277    | 11016 | 11214 | 11476 | 11537 | 11485 | 11346  |
|                     | 67     | 117.352041, 31.879816 | 11261   | 10619    | 10540    | 10895   | 11277    | 11016 | 11214 | 11476 | 11537 | 11485 | 11346  |
|                     | 68     | 117.352041, 31.879816 | 11261   | 10619    | 10540    | 10895   | 11277    | 11016 | 11214 | 11476 | 11537 | 11485 | 11346  |
|                     | 69     | 117.352041, 31.879816 | 11261   | 10619    | 10540    | 10895   | 11277    | 11016 | 11214 | 11476 | 11537 | 11485 | 11346  |
|                     | 70     | 117.352041, 31.879816 | 11261   | 10619    | 10540    | 10895   | 11277    | 11016 | 11214 | 11476 | 11537 | 11485 | 11346  |
|                     | 71     | 117.352041, 31.879816 | 11261   | 10619    | 10540    | 10895   | 11277    | 11016 | 11214 | 11476 | 11537 | 11485 | 11346  |
|                     | 72     | 117.352041, 31.879816 | 11261   | 10619    | 10540    | 10895   | 11277    | 11016 | 11214 | 11476 | 11537 | 11485 | 11346  |
|                     | 73     | 117.352041, 31.879816 | 11261   | 10619    | 10540    | 10895   | 11277    | 11016 | 11214 | 11476 | 11537 | 11485 | 11346  |
|                     | 74     | 117.352041, 31.879816 | 11261   | 10619    | 10540    | 10895   | 11277    | 11016 | 11214 | 11476 | 11537 | 11485 | 11346  |
|                     | 75     | 117.352041, 31.879816 | 11261   | 10619    | 10540    | 10895   | 11277    | 11016 | 11214 | 11476 | 11537 | 11485 | 11346  |
|                     | 76     | 117.352041, 31.879816 | 11261   | 10619    | 10540    | 10895   | 11277    | 11016 | 11214 | 11476 | 11537 | 11485 | 11346  |
|                     | 77     | 117.352041, 31.879816 | 11261   | 10619    | 10540    | 10895   | 11277    | 11016 | 11214 | 11476 | 11537 | 11485 | 11346  |
|                     | 78     | 117.352041, 31.879816 | 11261   | 10619    | 10540    | 10895   | 11277    | 11016 | 11214 | 11476 | 11537 | 11485 | 11346  |
|                     | 79     | 117.352041, 31.879816 | 11261   | 10619    | 10540    | 10895   | 11277    | 11016 | 11214 | 11476 | 11537 | 11485 | 11346  |
|                     | 80     | 117.352041, 31.879816 | 11261   | 10619    | 10540    | 10895   | 11277    | 11016 | 11214 | 11476 | 11537 | 11485 | 11346  |
|                     | 81     | 117.352041, 31.879816 | 11261   | 10619    | 10540    | 10895   | 11277    | 11016 | 11214 | 11476 | 11537 | 11485 | 11346  |
|                     | 82     | 117.352041, 31.879816 | 11261   | 10619    | 10540    | 10895   | 11277    | 11016 | 11214 | 11476 | 11537 | 11485 | 11346  |
|                     | 83     | 117.352041, 31.879816 | 11261   | 1061     |          |         |          |       |       |       |       |       |        |
